# Supplementary material for: Young at risk-people in Maputo City, Mozambique, present a high willingness to participate in HIV trials: Results from an HIV vaccine preparedness cohort study
Source: PubMed Central journal article supplement (PMC8638929; doi:10.1371/journal.pone.0260126), 2021-12-02
Supplement: pone.0260126.s001.pdf [file pone.0260126.s001.pdf]

**RV-363 HIV/AIDS Awareness, Vaccine Knowledge and Willingness to Participate Questionnaire**

Site  1 *CISPOC*  2 *CIDI*

Visit: \_\_\_\_\_

Subject Number    \_ \_ \_ \_ \_

**INTERVIEWER TO READ THIS**

Before we start, I would like to remind you about the interview process. Your participation in this interview and every aspect of the research study are completely voluntary. You may skip any question that you prefer not to answer, but I would appreciate if you answered all the questions. You can also ask me anytime to clarify questions that you do not understand, or you can decide to stop the interview at any time.

Any information you provide for this study will be kept confidential and cannot be shared with any individual, including your employer/boss, spouse, friends, or relatives. The responses that you provide to these questions will only be identified by a unique number, not by your name or any other identifying information.

Today I am going to ask you to tell me what you know about HIV infection, and some questions on what you know about vaccines. This questionnaire has only two sections.

If you have any questions please do not hesitate to ask me anytime as we go through the questions.

Thank you. Let us begin!

Time Interview Started: \_\_\_\_:\_\_\_\_ *hh:mm (24 hour clock time)*

Form Completed By:

|  |  |  |
|--|--|--|
|  |  |  |
|--|--|--|

Date Completed

*DD/MON/YYYY*    \_ \_ / \_ \_ / \_ \_ \_ \_

- |                                |                                                                                         |                                                                                                                                                                                                                                                                                                                                     |
|--------------------------------|-----------------------------------------------------------------------------------------|-------------------------------------------------------------------------------------------------------------------------------------------------------------------------------------------------------------------------------------------------------------------------------------------------------------------------------------|
| <p><b>** All Questions</b></p> | <p><b>OTHER (SPECIFY)</b></p> <p><b>REFUSED TO ANSWER</b></p> <p><b>DO NOT KNOW</b></p> | <p>= Responses which do not fit into any category. Should occur in minimal cases.</p> <p>= Respondent refused to answer the question for any reason. Should occur in minimal cases.</p> <p>= Respondent states they do not know. He/She may actually know, but does not want to give the answer. Should occur in minimal cases.</p> |
|--------------------------------|-----------------------------------------------------------------------------------------|-------------------------------------------------------------------------------------------------------------------------------------------------------------------------------------------------------------------------------------------------------------------------------------------------------------------------------------|

**RV-363 HIV/AIDS Awareness, Vaccine Knowledge and Willingness to Participate Questionnaire**

Site: <sub>1</sub> CISPOC <sub>2</sub> CIDI Subject Number \_\_\_\_\_ Visit: \_\_\_\_\_

**ADMINISTRATIVE INFORMATION**

1. Visit Date

DAY

MONTH

YEAR

2. Volunteer's residence (Identify code and record code number in boxes)

District code :

Neighborhood Code:

**INSTRUCTION FOR FORM COMPLETERS**

\*\*\* **DO NOT READ ANSWER CHOICES OUT ALOUD TO A PARTICIPANT UNLESS INSTRUCTED** \*\*\*

WITH  
**READ SIGN**

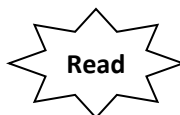

\*\*\*\*\***HOWEVER DO NOT READ**\*\*\*\*\*

**'REFUSED TO ANSWER'** and **'DO NOT KNOW'** answer choices

\*\*\*\* FOR SOME QUESTIONS YOU WILL SEE THE **ARROW SIGN FOLLOWED BY A LETTER 'Q' AND NUMBER OR SECTION**. IT IS INSTRUCTING YOU TO **'SKIP'** TO ANOTHER QUESTION OR SECTION. **PLEASE FOLLOW THE SKIP PATTERN CAREFULLY** \*\*\*

→**Q** Means **\*Skip\*** to another **Question**

→**SEC** Means **\*Skip\*** to the next **Section**

Site: <sub>1</sub> CISPOC <sub>2</sub> CIDI Subject Number \_\_\_\_\_ Visit: \_\_\_\_\_

**Section 1: AIDS AWARENESS**

1.1 I am going to read you a list of some ways people believe you can become infected with HIV. Please tell me which of the ways you agree that you could become infected with the HIV virus.

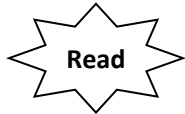

(CHECK ALL APPLICABLE ANSWERS)

- HAVING PENILE-VAGINAL SEX WITH SOMEONE WHO HAS THE HIV VIRUS
- PLACING YOUR MOUTH ON YOUR PARTNER'S GENITALS
- PLACING YOUR PENIS IN THE ANUS OR LETTING YOUR PARTNER PLACE HIS PENIS IN THE ANUS
- KISSING MOUTH TO MOUTH
- INJECTING DRUGS WITH SYRINGES OR NEEDLES, USED BY SOMEONE WHO HAS THE HIV VIRUS
- SHARING RAZORS, SCISSORS, NEEDLES WITH SOMEONE WHO HAS THE HIV VIRUS
- CONTACT WITH BODY EXCRETIONS FROM SOMEONE WITH THE HIV VIRUS
- GETTING BLOOD TRANSFUSION FROM SOMEONE WHO HAS THE HIV VIRUS
- A BABY BREAST FED BY MOTHER WHO HAS THE HIV VIRUS
- EXPERIMENTAL HIV VACCINES
- NONE OF THESE
- REFUSED TO ANSWER
- DO NOT KNOW

1.2 I am going to read a second list of some ways people believe you can become infected with HIV. Please tell me which of the ways you agree that you could become infected with the HIV virus.

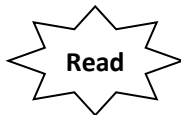

(CHECK ALL APPLICABLE ANSWERS)

- CONDOM
- WORKING NEAR SOMEONE WHO IS INFECTED WITH HIV
- SHARING EATING UTENSILS
- USING SAME TOILET WITH SOMEONE WHO HAS THE HIV VIRUS
- MOSQUITOES
- NONE OF THESE
- REFUSED TO ANSWER
- DO NOT KNOW

**RV-363 HIV/AIDS Awareness, Vaccine Knowledge and Willingness to Participate Questionnaire**

Site: <sub>1</sub> *CISPOC* <sub>2</sub> *CIDI* Subject Number \_\_\_\_\_ Visit: \_\_\_\_\_

|                   |                                                                                                                                                                                                                                                                               |                                                                                                                                                                                                                                                                                                                                                                                                                                                                                                                                                                                                                                                                                                                                                                                                                                                                                                                                                                                                                                                                                                            |  |                                                                                                                                                                                                                                                                                                                                                                                                                                                               |    |    |     |    |                   |    |             |    |
|-------------------|-------------------------------------------------------------------------------------------------------------------------------------------------------------------------------------------------------------------------------------------------------------------------------|------------------------------------------------------------------------------------------------------------------------------------------------------------------------------------------------------------------------------------------------------------------------------------------------------------------------------------------------------------------------------------------------------------------------------------------------------------------------------------------------------------------------------------------------------------------------------------------------------------------------------------------------------------------------------------------------------------------------------------------------------------------------------------------------------------------------------------------------------------------------------------------------------------------------------------------------------------------------------------------------------------------------------------------------------------------------------------------------------------|--|---------------------------------------------------------------------------------------------------------------------------------------------------------------------------------------------------------------------------------------------------------------------------------------------------------------------------------------------------------------------------------------------------------------------------------------------------------------|----|----|-----|----|-------------------|----|-------------|----|
| <p>1.3</p>        | <p>From this list that I am going to read, tell me which ways you think a person can avoid or prevent getting infected with HIV?</p> <p>(CHECK ALL APPLICABLE ANSWERS)</p>                                                                                                    | <ul style="list-style-type: none"> <li><input type="checkbox"/> HAVE SEX ONLY WITH HEALTHY-LOOKING PERSONS</li> <li><input type="checkbox"/> USE CONDOMS</li> <li><input type="checkbox"/> USE FAMILY PLANNING SPERMICIDES BEFORE SEX</li> <li><input type="checkbox"/> CLEANING/DOUCHING AFTER SEX</li> <li><input type="checkbox"/> WITHDRAW BEFORE EJACULATING</li> <li><input type="checkbox"/> ABSTAIN FROM SEX</li> <li><input type="checkbox"/> DON'T SHARE NEEDLES</li> <li><input type="checkbox"/> REFUSED TO ANSWER</li> <li><input type="checkbox"/> DO NOT KNOW</li> </ul> <div style="text-align: right;">  </div>                                                                                                                                                                                                                                                                                                                                                                                        |  |                                                                                                                                                                                                                                                                                                                                                                                                                                                               |    |    |     |    |                   |    |             |    |
| <p>1.4</p>        | <p>Can you tell by looking at someone if they have the HIV virus?</p> <div style="text-align: center;"> <table border="1" style="display: inline-table; width: 60px; height: 30px;"> <tr> <td style="width: 30px;"></td> <td style="width: 30px;"></td> </tr> </table> </div> |                                                                                                                                                                                                                                                                                                                                                                                                                                                                                                                                                                                                                                                                                                                                                                                                                                                                                                                                                                                                                                                                                                            |  | <table style="width: 100%; border-collapse: collapse;"> <tr> <td style="text-align: right;">NO</td> <td style="text-align: right;">00</td> </tr> <tr> <td style="text-align: right;">YES</td> <td style="text-align: right;">01</td> </tr> <tr> <td style="text-align: right;">REFUSED TO ANSWER</td> <td style="text-align: right;">88</td> </tr> <tr> <td style="text-align: right;">DO NOT KNOW</td> <td style="text-align: right;">99</td> </tr> </table> | NO | 00 | YES | 01 | REFUSED TO ANSWER | 88 | DO NOT KNOW | 99 |
|                   |                                                                                                                                                                                                                                                                               |                                                                                                                                                                                                                                                                                                                                                                                                                                                                                                                                                                                                                                                                                                                                                                                                                                                                                                                                                                                                                                                                                                            |  |                                                                                                                                                                                                                                                                                                                                                                                                                                                               |    |    |     |    |                   |    |             |    |
| NO                | 00                                                                                                                                                                                                                                                                            |                                                                                                                                                                                                                                                                                                                                                                                                                                                                                                                                                                                                                                                                                                                                                                                                                                                                                                                                                                                                                                                                                                            |  |                                                                                                                                                                                                                                                                                                                                                                                                                                                               |    |    |     |    |                   |    |             |    |
| YES               | 01                                                                                                                                                                                                                                                                            |                                                                                                                                                                                                                                                                                                                                                                                                                                                                                                                                                                                                                                                                                                                                                                                                                                                                                                                                                                                                                                                                                                            |  |                                                                                                                                                                                                                                                                                                                                                                                                                                                               |    |    |     |    |                   |    |             |    |
| REFUSED TO ANSWER | 88                                                                                                                                                                                                                                                                            |                                                                                                                                                                                                                                                                                                                                                                                                                                                                                                                                                                                                                                                                                                                                                                                                                                                                                                                                                                                                                                                                                                            |  |                                                                                                                                                                                                                                                                                                                                                                                                                                                               |    |    |     |    |                   |    |             |    |
| DO NOT KNOW       | 99                                                                                                                                                                                                                                                                            |                                                                                                                                                                                                                                                                                                                                                                                                                                                                                                                                                                                                                                                                                                                                                                                                                                                                                                                                                                                                                                                                                                            |  |                                                                                                                                                                                                                                                                                                                                                                                                                                                               |    |    |     |    |                   |    |             |    |
| <p>1.5</p>        | <p>If you tested HIV positive and chose to disclose your status to others, which of the following things do you think would happen in your life?</p> <p>(CHECK ALL APPLICABLE ANSWERS)</p>                                                                                    | <ul style="list-style-type: none"> <li><input type="checkbox"/> BREAK UP OF MARRIAGE</li> <li><input type="checkbox"/> BREAK UP OF SEXUAL RELATIONSHIPS</li> <li><input type="checkbox"/> PHYSICAL ABUSE BY SPOUSE/SEXUAL PARTNER</li> <li><input type="checkbox"/> INCREASED SUPPORT FROM SPOUSE/SEXUAL PARTNER</li> <li><input type="checkbox"/> DISCRIMINATION BY EMPLOYERS</li> <li><input type="checkbox"/> INCREASED SUPPORT FROM EMPLOYERS</li> <li><input type="checkbox"/> NEGLECTED BY FAMILY</li> <li><input type="checkbox"/> DISOWNED BY FAMILY</li> <li><input type="checkbox"/> INCREASED SUPPORT FROM FAMILY AND RELATIVES</li> <li><input type="checkbox"/> ESTRANGED FROM MY PEERS</li> <li><input type="checkbox"/> INCREASED SUPPORT FROM PEERS</li> <li><input type="checkbox"/> OTHER (SPECIFY)</li> <li style="margin-left: 40px;">_____</li> <li><input type="checkbox"/> REFUSED TO ANSWER</li> <li><input type="checkbox"/> DO NOT KNOW</li> </ul> <div style="text-align: right;">  </div> |  |                                                                                                                                                                                                                                                                                                                                                                                                                                                               |    |    |     |    |                   |    |             |    |

**RV-363 HIV/AIDS Awareness, Vaccine Knowledge and Willingness to Participate Questionnaire**

Site:  <sub>1</sub> *CISPOC*  <sub>2</sub> *CIDI*    Subject Number \_\_\_\_\_    Visit: \_\_\_\_\_

1.6 Prior to coming in for this study, which of the following ways did you receive information about HIV/AIDS?

(CHECK ALL APPLICABLE ANSWERS)

- NO INFORMATION ABOUT HIV/AIDS
- NEWSPAPER OR MAGAZINES
- RADIO
- TELEVISION
- FRIENDS/NEIGHBOURS
- FAMILY
- SCHOOL
- HEALTH PERSONNEL
- POSTER/PAMPHLET
- NGO OUTREACH
- INTERNET
- SITE RECRUITMENT STAFF
- COMMUNITY EVENT
- OTHER (SPECIFY)

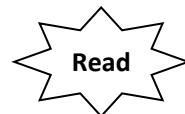

- 
- REFUSED TO ANSWER
  - DO NOT KNOW

**Section 2: VACCINE KNOWLEDGE**

*I am now going to ask you some questions about vaccines. These questions are intended to assess your understanding of what vaccines are, and the purpose of vaccines. This information will help the study team design appropriate education materials on vaccines for people in your community.*

2.1 Can you please tell me if the following statement is true or false?

**"A vaccine is meant to prevent illness"**

|  |  |
|--|--|
|  |  |
|--|--|

|                   |    |
|-------------------|----|
| FALSE             | 00 |
| TRUE              | 01 |
| REFUSED TO ANSWER | 88 |
| DO NOT KNOW       | 99 |

2.2 Prior to coming to this study, have you ever received education/information on HIV vaccine research?

|  |  |
|--|--|
|  |  |
|--|--|

|                   |    |
|-------------------|----|
| NO                | 00 |
| YES               | 01 |
| REFUSED TO ANSWER | 88 |
| DO NOT KNOW       | 99 |

→Sec.3

Site: <sub>1</sub> CISPOC <sub>2</sub> CIDI Subject Number \_\_\_\_\_ Visit: \_\_\_\_\_

2.3 From this list I'm going to read, which of these sources have you received information about HIV vaccine research?

(CHECK ALL APPLICABLE ANSWERS)

- HOSPITAL/CLINIC/HEALTH WORKER
- RADIO/TV
- NEWSPAPER/BROCHURE/MAGAZINES
- FRIEND/RELATIVE
- INTERNET
- NGO
- POSTER
- LEARNED FROM A VACCINE TRIAL VOLUNTEER
- I WAS A VACCINE TRIAL VOLUNTEER
- RESEARCH CENTER
- SCHOOL
- OTHER (SPECIFY) \_\_\_\_\_
- REFUSED TO ANSWER       DO NOT KNOW

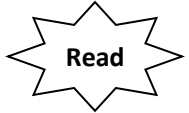

### Section 3: Willingness to Participate in Clinical Trials

*Clinical trials are studies performed with human subjects to test new vaccines, new drugs or new devices. Clinical trials are used to determine whether these new biomedical interventions are safe and effective. For example, when we have a candidate HIV vaccine, we would test it experimentally in a controlled environment first. This process is called a clinical trial.*

3.1 Would you be willing to participate in such a study to test an experimental HIV vaccine?

|  |  |
|--|--|
|  |  |
|--|--|

- NO 00
- YES 01
- SOMEONE ELSE WOULD DECIDE 02
- REFUSED TO ANSWER 88
- DO NOT KNOW 99

→Q3.3

3.2 Please tell us why you will not be willing to participate in a vaccine study?

(CHECK ALL APPLICABLE ANSWERS)

- FEAR OF NEEDLE
- FEAR OF GETTING HIV
- SPOUSE/SEXUAL PARTNER REFUSAL
- FEAR OF SIDE EFFECTS
- FEAR OF DEATH
- FEAR OF FETAL ABNORMALITIES
- TIME REQUIRED FOR VISITS
- FEAR OF TESTING HIV POSITIVE
- I KNOW I AM HIV POSITIVE
- FEAR OF DISCRIMINATION
- OTHER (SPECIFY) \_\_\_\_\_
- REFUSED TO ANSWER
- DO NOT KNOW

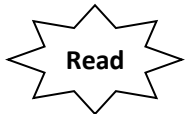

Site: <sub>1</sub> CISPOC <sub>2</sub> CIDI Subject Number \_\_\_\_\_ Visit: \_\_\_\_\_

3.3 From this list I'm going to read, can you please choose some of personal advantages of participating in a study of an HIV vaccine?

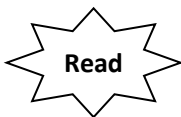

(CHECK ALL APPLICABLE ANSWERS)

- LEARN HOW TO AVOID RISKY BEHAVIOR
- FEEL PROTECTED FROM HIV INFECTION
- GET FREE HIV COUNSELING AND TESTING
- RECEIVE UPDATED INFORMATION ABOUT HIV/AIDS
- GET SMALL REIMBURSEMENT EVERY TIME I COME TO A STUDY VISIT
- BE TESTED FOR SEXUALLY TRANSMITTED INFECTION
- RECEIVE REGULAR HEALTH CARE RELATED TO RESEARCH
- GET FREE PREGNANCY TEST EVERY 3 MONTHS
- OTHER (SPECIFY)  
\_\_\_\_\_
- REFUSED TO ANSWER
- DO NOT KNOW

3.4 How likely or unlikely would you be to enroll in a research study of a new experimental HIV vaccine if:

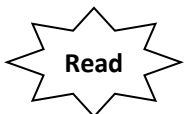

(Use these responses to fill the question below)

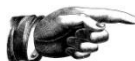

- VERY UNLIKELY 00
- SOMEWHAT UNLIKELY 01
- SOMEWHAT LIKELY 02
- VERY LIKELY 03
- NOT APPLICABLE 77
- REFUSED TO ANSWER 88
- DO NOT KNOW 99

- a. YOU WERE REQUIRED TO COME TO THE CENTER ON A SPECIFIC DAY EVERY THREE MONTHS FOR TWO YEARS
- b. YOU WERE REQUIRED TO TALK TO A NURSE ABOUT YOUR EXPERIENCES IN THE STUDY
- c. YOU WERE REQUIRED TO BE TESTED FOR HIV EVERY THREE MONTHS
- d. YOU WERE REQUIRED TO BE INJECTED WITH A VACCINE CANDIDATE A FEW TIMES
- e. YOU WERE REQUIRED TO GIVE BLOOD SAMPLES EVERY TIME YOU CAME FOR A STUDY VISIT
- f. THE RESEARCH CENTER WERE OPEN ON THE WEEKEND (E.G. SATURDAYS)
- g. IF FEMALE: YOU WERE REQUIRED TO USE A CONTRACEPTIVE METHOD SUCH AS HORMONAL CONTRACEPTION WHILE YOU ARE IN THE STUDY

**RV-363 HIV/AIDS Awareness, Vaccine Knowledge and Willingness to Participate Questionnaire**

Site: <sub>1</sub> **CISPOC** <sub>2</sub> **CIDI** Subject Number \_\_\_\_\_ Visit: \_\_\_\_\_

3.5 How important are the following factors in making a decision about participating in a research study of an experimental HIV vaccine?

NOT IMPORTANT AT ALL 00  
SOMEWHAT IMPORTANT 01  
IMPORTANT 02  
VERY IMPORTANT 03  
REFUSED TO ANSWER 88  
DO NOT KNOW 99

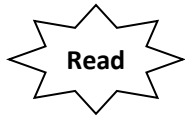

*(Use these responses to fill the question below)*

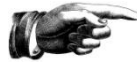

- a. I MAY BE HELPING FIND AN HIV VACCINE THAT WORKS
- b. I WOULD BE HELPING STOP THE HIV/AIDS EPIDEMIC
- c. MY FRIENDS AND FAMILY WOULD SUPPORT ME
- d. I WOULD MEET NEW PEOPLE
- e. I WOULD BE HELPING MY COMMUNITY
- f. I WOULD BE HELPING MY COUNTRY
- g. I WOULD BE HELPING ADVANCE HIV PREVENTION RESEARCH
- h. PEOPLE MAY THINK I HAVE HIV/AIDS
- i. PEOPLE MAY THINK THAT I AM AT RISK FOR HIV/AIDS
- j. PEOPLE MAY NOT WANT TO HAVE SEX WITH ME
- k. PEOPLE MAY REFUSE CONTACT WITH ME

3.6 Do you think a preventive HIV vaccine would be useful in controlling HIV infection?

NO 00  
YES 01  
REFUSED TO ANSWER 88  
DO NOT KNOW 99

**Ask the question below only at 'Exit Visit'**

3.7 Can we contact you for future HIV vaccine studies?

NO 00  
YES 01



Site: <sub>1</sub> CISPOC <sub>2</sub> CIDI Subject Number \_\_\_\_\_ Visit: \_\_\_\_\_

**CLOSING REMARKS**

**\*\* BEFORE YOU RELEASE THE VOLUNTEER, CHECK THAT ALL QUESTIONS ARE ANSWERED.**

Remember to record 'Time Interview Ended' at the bottom this page

**INTERVIEWER TO READ THIS**

Now I will be happy to let you know that I have finished all the questions. I would like to thank you for your patience, co-operation and honesty in answering the questions. I know it was a long and exhausting process for you, with some very sensitive and personal questions. We are grateful for your co-operation.

Again, I would like to remind you that all information you provided for this study will be kept confidential and will not be shared with any individual, including your employer/boss, spouse, friends or relatives. The responses that you provide to these questions will only be identified by a unique number, not by your name or any other identifying information.

**THANK YOU VERY MUCH!**

**Time Interview Ended:** \_\_\_\_:\_\_\_\_ *hh:mm (24 hour clock time)*

1<sup>st</sup> Data Entry Initials/Date \_\_\_\_\_

2<sup>nd</sup> Data Entry Initials/Date \_\_\_\_\_
